# Supplementary material for: AGGRESCAN: a server for the prediction and evaluation of "hot spots" of aggregation in polypeptides
Source: PubMed Central journal article supplement (PMC1828741; doi:10.1186/1471-2105-8-65), 2007-02-27
Supplement: 1471-2105-8-65-S2.pdf [file 1471-2105-8-65-S2.pdf]

## Additional file 2

### Help file of AGGRESKAN

#### Sequence Name

Name given by the user to the input amino-acid sequence.

#### Graphics

1) Profile graphic  : [a<sup>3</sup>v](#) (red), [a<sup>3</sup>vSA](#) (green line) and [HST](#) (blue) as function of amino acid sequence.

2) Area Graphic  [HSA](#) as function of amino acid sequence. If there are no hot spots, the graphic  is displayed.

3) Normalized-Area graphic  [NHSA](#) for 100 residues as function of amino acid sequence.

#### amino-acid aggregation-propensity value. (a<sup>3</sup>v)

N. Sánchez de Groot et al. Prediction of "hot spots" of aggregation in disease-linked polypeptides. [BMC Structural Biology 2005, 5:18](#). See [table](#) for actual values.

#### a<sup>3</sup>v Sequence Average. (a<sup>3</sup>vSA)

Average of the [a<sup>3</sup>v](#) over the entire input amino-acid sequence.

#### Hot Spot Threshold (HST)

Average of the result of multiplying the [a<sup>3</sup>v](#) of each of the 20 natural amino acids by its frequency in the SwissProt database. Its current value is -0.02.

#### a<sup>3</sup>v window average (a<sup>4</sup>v)

[a<sup>3</sup>v](#) average over a sliding window of 5, 7, 9 or 11 residues (depending on total sequence length). The resulting value is assigned to the central residue in the window. In this way, all but the 2, 3, 4 or 5 N- and C-terminal residues (for a 5-, 7-, 9- or 11-residue window, respectively) are assigned an a<sup>4</sup>v. The 2 extreme residues are given specific a<sup>4</sup>v to account for charge effects. The remaining off-centre N- and C-terminal residues are assigned the a<sup>4</sup>v calculated for the first and last window centres, respectively.

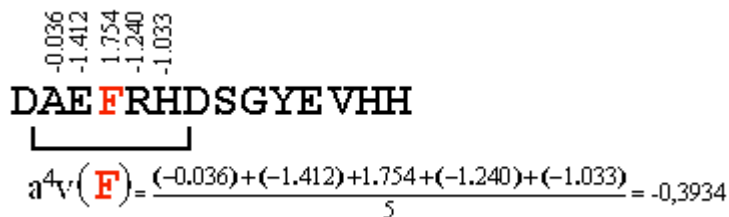
$$a^{4v}(F) = \frac{(-0.036) + (-1.412) + 1.754 + (-1.240) + (-1.033)}{5} = -0,3934$$

#### Agregation Profile (AP)

Sequence of the [a<sup>4</sup>v](#) for the input amino-acid sequence.

#### Hot Spot (HS)

Region with 5 or more residues on sequence with an [a<sup>4</sup>v](#) larger than [HST](#) and no proline (aggregation breaker).

### **Number of Hot Spots (nHS)**

Number of [HS](#) in the input amino-acid sequence.

### **Normalized number of Hot Spots for 100 residues (NnHS)**

[nHS](#) divided by the number of residues in the input sequence and multiplied by 100

### **a<sup>4v</sup> average in the Hot Spot (a<sup>4v</sup>AHS)**

[a<sup>4v</sup>](#) average in a given [HS](#).

### **Total Area of the aggregation profile (TA)**

Area of the [AP](#) (taking [HST](#) as the zero axis) along the entire input amino-acid sequence, calculated with trapezoidal integration ([midpoint rule](#)).

### **Area of the Aggregation Profile above the hot-spot Threshold (AAT)**

Area of the [AP](#) above the [HST](#) along the entire input amino-acid sequence, calculated with trapezoidal integration([midpoint rule](#)).

### **AAT per residue (AATr)**

[AAT](#) divided by the number of residues in the input amino-acid sequence.

### **Hot-Spot Area (HSA)**

Area of the [AP](#) above the [HST](#) in a given [HS](#), calculated with trapezoidal integration ([midpoint rule](#)). The HSA of a residue in a hot spot is set equal to the HSA of the hot spot.

### **Normalized Hot-Spot Area per residue (NHSA)**

[HSA](#) divided by the number of residues in the input sequence.

### **Total Hot-Spot Area (THSA)**

Sum of the [HSA](#) of the individual [HS](#).

### **THSA per residue (THSAr)**

[THSA](#) divided by the number of residues in the input amino-acid sequence.

### **AA**

This column is the amino acid sequence of the protein

### **a<sup>4v</sup> Sequence Sum (a<sup>4v</sup>SS)**

Sum of [a<sup>4v</sup>](#) over the entire input amino-acid sequence.

### **Normalized a<sup>4v</sup>SS for 100 residues (Na<sup>4v</sup>SS)**

[a<sup>4v</sup>SS](#) divided by the number of residues in the input amino-acid sequence and multiplied by 100.
