# Supplementary material for: AGGRESCAN: a server for the prediction and evaluation of "hot spots" of aggregation in polypeptides
Source: PubMed Central journal article supplement (PMC1828741; doi:10.1186/1471-2105-8-65), 2007-02-27
Supplement: 1471-2105-8-65-S3.pdf [file 1471-2105-8-65-S3.pdf]

# Additional file 3

## Example of an output of AGGRESCAN

### Output Example

|                                                        | Sequence Name: sh3 | sh3n47a | Average over all sequences |
|--------------------------------------------------------|--------------------|---------|----------------------------|
| Graphics:                                              |                    |         |                            |
| sDv Sequence Average (sDvSA):                          | -0.126             | -0.105  | -0.115                     |
| Number of Hot Spots (nHS):                             | 3                  | 4       | 3.500                      |
| Normalized nHS for 100 residues (NnHS):                | 4.839              | 6.452   | 5.645                      |
| Area of the profile Above Threshold (AAT):             | 11.068             | 11.250  | 11.159                     |
| Total Hot Spot Area (THSA):                            | 9.183              | 10.247  | 9.715                      |
| Total Area (TA):                                       | -6.674             | -5.408  | -6.041                     |
| AAT per residue (AATr):                                | 0.179              | 0.181   | 0.180                      |
| THSA per residue (THSAr):                              | 0.148              | 0.165   | 0.157                      |
| Normalized sDv Sequence Sum for 100 residues (NsDvSS): | -13.9              | -11.9   | -12.900                    |

  

| #  | AA | sDv    | HSA   | NHSA  | sDvAHS | #  | AA | sDv    | HSA   | NHSA  | sDvAHS |
|----|----|--------|-------|-------|--------|----|----|--------|-------|-------|--------|
| 1  | m  | -0.824 | 0.000 | 0.000 | 0.000  | 1  | m  | -0.824 | 0.000 | 0.000 | 0.000  |
| 2  | d  | -0.824 | 0.000 | 0.000 | 0.000  | 2  | d  | -0.824 | 0.000 | 0.000 | 0.000  |
| 3  | e  | -0.606 | 0.000 | 0.000 | 0.000  | 3  | e  | -0.606 | 0.000 | 0.000 | 0.000  |
| 4  | t  | -0.975 | 0.000 | 0.000 | 0.000  | 4  | t  | -0.975 | 0.000 | 0.000 | 0.000  |
| 5  | g  | -0.890 | 0.000 | 0.000 | 0.000  | 5  | g  | -0.890 | 0.000 | 0.000 | 0.000  |
| 6  | k  | -0.331 | 0.000 | 0.000 | 0.000  | 6  | k  | -0.331 | 0.000 | 0.000 | 0.000  |
| 7  | e  | 0.019  | 4.298 | 0.537 | 0.517  | 7  | e  | 0.019  | 4.298 | 0.537 | 0.517  |
| 8  | i  | 0.402  | 4.298 | 0.537 | 0.517  | 8  | i  | 0.402  | 4.298 | 0.537 | 0.517  |
| 9  | v  | 0.581  | 4.298 | 0.537 | 0.517  | 9  | v  | 0.581  | 4.298 | 0.537 | 0.517  |
| 10 | l  | 1.140  | 4.298 | 0.537 | 0.517  | 10 | l  | 1.140  | 4.298 | 0.537 | 0.517  |
| 11 | a  | 1.095  | 4.298 | 0.537 | 0.517  | 11 | a  | 1.095  | 4.298 | 0.537 | 0.517  |
| 12 | i  | 0.409  | 4.298 | 0.537 | 0.517  | 12 | i  | 0.409  | 4.298 | 0.537 | 0.517  |
| 13 | y  | 0.365  | 4.298 | 0.537 | 0.517  | 13 | y  | 0.365  | 4.298 | 0.537 | 0.517  |
| 14 | d  | 0.126  | 4.298 | 0.537 | 0.517  | 14 | d  | 0.126  | 4.298 | 0.537 | 0.517  |
| 15 | y  | -0.432 | 0.000 | 0.000 | 0.000  | 15 | y  | -0.432 | 0.000 | 0.000 | 0.000  |
| 16 | q  | -0.850 | 0.000 | 0.000 | 0.000  | 16 | q  | -0.850 | 0.000 | 0.000 | 0.000  |
| 17 | e  | -0.542 | 0.000 | 0.000 | 0.000  | 17 | e  | -0.542 | 0.000 | 0.000 | 0.000  |
| 18 | k  | -0.840 | 0.000 | 0.000 | 0.000  | 18 | k  | -0.840 | 0.000 | 0.000 | 0.000  |
| 19 | s  | -0.842 | 0.000 | 0.000 | 0.000  | 19 | s  | -0.842 | 0.000 | 0.000 | 0.000  |
| 20 | p  | -0.842 | 0.000 | 0.000 | 0.000  | 20 | p  | -0.842 | 0.000 | 0.000 | 0.000  |
| 21 | r  | -0.337 | 0.000 | 0.000 | 0.000  | 21 | r  | -0.337 | 0.000 | 0.000 | 0.000  |
| 22 | s  | -0.310 | 0.000 | 0.000 | 0.000  | 22 | s  | -0.310 | 0.000 | 0.000 | 0.000  |
| 23 | v  | -0.061 | 0.000 | 0.000 | 0.000  | 23 | v  | -0.061 | 0.000 | 0.000 | 0.000  |
| 24 | t  | 0.000  | 0.137 | 0.000 | 0.049  | 24 | t  | 0.000  | 0.137 | 0.000 | 0.049  |
| 25 | m  | 0.097  | 0.137 | 0.000 | 0.049  | 25 | m  | 0.097  | 0.137 | 0.000 | 0.049  |
| 26 | k  | -0.329 | 0.000 | 0.000 | 0.000  | 26 | k  | -0.329 | 0.000 | 0.000 | 0.000  |
| 27 | k  | -0.665 | 0.000 | 0.000 | 0.000  | 27 | k  | -0.665 | 0.000 | 0.000 | 0.000  |
| 28 | g  | -0.482 | 0.000 | 0.000 | 0.000  | 28 | g  | -0.482 | 0.000 | 0.000 | 0.000  |
| 29 | d  | -0.020 | 0.000 | 0.000 | 0.000  | 29 | d  | -0.020 | 0.000 | 0.000 | 0.000  |
| 30 | i  | 0.134  | 2.870 | 0.478 | 0.458  | 30 | i  | 0.134  | 2.870 | 0.478 | 0.458  |
| 31 | l  | 0.517  | 2.870 | 0.478 | 0.458  | 31 | l  | 0.517  | 2.870 | 0.478 | 0.458  |
| 32 | t  | 1.161  | 2.870 | 0.478 | 0.458  | 32 | t  | 1.161  | 2.870 | 0.478 | 0.458  |
| 33 | l  | 0.536  | 2.870 | 0.478 | 0.458  | 33 | l  | 0.536  | 2.870 | 0.478 | 0.458  |
| 34 | i  | 0.201  | 2.870 | 0.478 | 0.458  | 34 | i  | 0.201  | 2.870 | 0.478 | 0.458  |
| 35 | n  | 0.201  | 2.870 | 0.478 | 0.458  | 35 | n  | 0.201  | 2.870 | 0.478 | 0.458  |
| 36 | s  | -0.335 | 0.000 | 0.000 | 0.000  | 36 | s  | -0.335 | 0.000 | 0.000 | 0.000  |
| 37 | t  | -0.798 | 0.000 | 0.000 | 0.000  | 37 | t  | -0.798 | 0.000 | 0.000 | 0.000  |
| 38 | n  | -0.904 | 0.000 | 0.000 | 0.000  | 38 | n  | -0.904 | 0.000 | 0.000 | 0.000  |
| 39 | k  | -0.638 | 0.000 | 0.000 | 0.000  | 39 | k  | -0.638 | 0.000 | 0.000 | 0.000  |
| 40 | d  | -0.399 | 0.000 | 0.000 | 0.000  | 40 | d  | -0.399 | 0.000 | 0.000 | 0.000  |
| 41 | w  | -0.325 | 0.000 | 0.000 | 0.000  | 41 | w  | -0.325 | 0.000 | 0.000 | 0.000  |
| 42 | w  | 0.180  | 0.882 | 0.000 | 0.274  | 42 | w  | 0.180  | 1.064 | 0.213 | 0.193  |
| 43 | k  | 0.265  | 0.882 | 0.000 | 0.274  | 43 | k  | 0.265  | 1.064 | 0.213 | 0.193  |
| 44 | v  | 0.376  | 0.882 | 0.000 | 0.274  | 44 | v  | 0.376  | 1.064 | 0.213 | 0.193  |
| 45 | e  | -0.091 | 0.000 | 0.000 | 0.000  | 45 | e  | 0.162  | 1.064 | 0.213 | 0.193  |
| 46 | v  | -0.272 | 0.000 | 0.000 | 0.000  | 46 | v  | -0.019 | 1.064 | 0.213 | 0.193  |
| 47 | N  | -0.839 | 0.000 | 0.000 | 0.000  | 47 | A  | -0.586 | 0.000 | 0.000 | 0.000  |
| 48 | d  | -0.803 | 0.000 | 0.000 | 0.000  | 48 | d  | -0.550 | 0.000 | 0.000 | 0.000  |
| 49 | r  | -1.229 | 0.000 | 0.000 | 0.000  | 49 | r  | -0.976 | 0.000 | 0.000 | 0.000  |
| 50 | q  | -0.618 | 0.000 | 0.000 | 0.000  | 50 | q  | -0.618 | 0.000 | 0.000 | 0.000  |
| 51 | g  | 0.068  | 0.867 | 0.000 | 0.269  | 51 | g  | 0.068  | 0.867 | 0.000 | 0.269  |
| 52 | f  | 0.250  | 0.867 | 0.000 | 0.269  | 52 | f  | 0.250  | 0.867 | 0.000 | 0.269  |
| 53 | v  | 0.489  | 0.867 | 0.000 | 0.269  | 53 | v  | 0.489  | 0.867 | 0.000 | 0.269  |
| 54 | p  | 0.588  | 0.000 | 0.000 | 0.000  | 54 | p  | 0.588  | 0.000 | 0.000 | 0.000  |
| 55 | a  | 0.469  | 2.014 | 0.403 | 0.383  | 55 | a  | 0.469  | 2.014 | 0.403 | 0.383  |
| 56 | s  | 0.469  | 2.014 | 0.403 | 0.383  | 56 | s  | 0.469  | 2.014 | 0.403 | 0.383  |
| 57 | y  | 0.350  | 2.014 | 0.403 | 0.383  | 57 | y  | 0.350  | 2.014 | 0.403 | 0.383  |
| 58 | v  | 0.171  | 2.014 | 0.403 | 0.383  | 58 | v  | 0.171  | 2.014 | 0.403 | 0.383  |
| 59 | k  | 0.454  | 2.014 | 0.403 | 0.383  | 59 | k  | 0.454  | 2.014 | 0.403 | 0.383  |
| 60 | k  | -0.145 | 0.000 | 0.000 | 0.000  | 60 | k  | -0.145 | 0.000 | 0.000 | 0.000  |
| 61 | l  | -0.681 | 0.000 | 0.000 | 0.000  | 61 | l  | -0.681 | 0.000 | 0.000 | 0.000  |
| 62 | d  | -0.681 | 0.000 | 0.000 | 0.000  | 62 | d  | -0.681 | 0.000 | 0.000 | 0.000  |

Sorted by NsDvSS

sh3n47a -11.90

sh3 -13.90
