# Supplementary material for: AGGRESCAN: a server for the prediction and evaluation of "hot spots" of aggregation in polypeptides
Source: PubMed Central journal article supplement (PMC1828741; doi:10.1186/1471-2105-8-65), 2007-02-27
Supplement: 1471-2105-8-65-S4.pdf [file 1471-2105-8-65-S4.pdf]

## Additional file 4 Protein data sets tested with AGGRESCAN

### Globular proteins (SCOP) data set<sup>a</sup>

|             |             |          |               |             |         |          |         |
|-------------|-------------|----------|---------------|-------------|---------|----------|---------|
| >d1dlwa 1   | >d1kcw1     | >d1ri6a  | >d1fxxa       | >d1ehya     | >d1i50a | >d1oc7a  | >d2nmba |
| >d1s69a 1   | >d1sddb2    | >d1olza2 | >d1j9aa       | >d1llfa     | >d1k8ta | >d1m65a  | >d1q67a |
| >d1idra     | >d1ikop     | >d1shyb1 | >d1b8oa       | >d1qj4a     | >d1vdda | >d1l6ra  | >d1es9a |
| >d1ngka     | >d1so9a     | >d1g72a  | >d1q1ga       | >d1kica     | >d1kq3a | >d1uj6a1 | >d1h05a |
| >d1kr7a     | >d2viua     | >d1dosa  | >d1jwqa       | >d1gy7a     | >d1slqa | >d1soua  | >d1k7ka |
| >d1b9f 90   | >d1szia     | >d1ohla  | >d1di6a       | >d1nwwa     | >d1acc  | >d1oxwa  | >d2dpma |
| >d1ui5a1    | >d1ug7a     | >d1of8a  | >d1m72a       | >d1ktua     | >d1vjua | >d1h1da  | >d1inla |
| >d1t33a1    | >d1uw4b     | >d1kkoa1 | >d1nw9b       | >d1lqva     | >d1lm5a | >d1nt2a  | >d1th0a |
| >d1rr7a     | >d1sdia 198 | >d1jqna  | >d1vhua       | >d1s1qa     | >d1sw6a | >d1qyra  | >d1szaa |
| >d1mtyg 233 | >d1r75a     | >d1l1la  | >d1xvaa c665  | >d1gx1a     | >d1lkxa | >d1k75a  | >d1q2za |
| >d1om2a 234 | >d1pm4a     | >d1r61a  | >d1jqea c669  | >d1q8ra     | >d1ku1a | >d1jixa  | >d1itha |
| >d1jw2a 235 | >d1aol      | >d1kid   | >d1l3ia c6622 | >d1dwna d85 | >d1klxa | >d1rrea  | >d1q1fa |
| >d1m1eb     | >d1utya     | >d1gmla  | >d1nw3a       | >d1l5ia     | >d1ld8a | >d1vd2a  | >d1e31a |
| >d1gs9a     | >d1aly      | >d1vjza  | >d1jg1a       | >d1omha     | >d1qjba | >d1m2xa  | >d1jtia |
| >d1jkva 253 | >d1fl0a     | >d1osna  | >d1m32a       | >d1utea     | >d1hh8a | >d1utea  | >d1tlja |
| >d1rtyb     | >d1d7qa     | >d1zin1  | >d2gsaa       | >d1auia     | >d1n08a | >d1t7ra  | >d1p0ha |
| >d1noga     | >d1gpc      | >d1vhta  | >d2oata       | >d1uf5a     | >d1d1na | >d1ie9a  | >d1cjwa |
| >d1niga     | >d1e9ga     | >d1kaga  | >d1m7ya       | >d1i7qa     | >d1jj2b | >d1ak0   | >d1bo4a |
| >d1bgc      | >d1k8qa     | >d1m7ga  | >d1ga8a       | >d1ae9a     | >d1k0ha | >d1shwa  | >d1fw9a |
| >d1gw0a3    | >d1jofa     | >d1musa  | >d1wm1a       | >d1u09a e84 | >d1ewna | >d1t2sa  | >d1puja |

## Inclusion bodies forming proteins data set<sup>b</sup>

|           |            |           |           |            |            |         |
|-----------|------------|-----------|-----------|------------|------------|---------|
| >1xat     | >p9752     | >P28784   | >CAA84850 | >AAB64992  | > CAA90962 | >atCKA1 |
| >AAA03018 | >q97q4     | >Q06700   | >CAA44325 | >AAC35427  | > 2107187A |         |
| >AAC36914 | >s50990    | >P56007   | >CAC42773 | >BAA08203  | > AAB07708 |         |
| >AAD15038 | >CAA49762  | >P56006   | >CAB43519 | >BAA31582  | >AAA93168  |         |
| >AAG18010 | >CAC11023  | >P37698   | >CAB43097 | >2TMP      | > AAA66345 |         |
| >AAO83646 | >CAC11021  | >P43387   | >Q27607   | >1LQH      | >I51190    |         |
| >AAP74699 | >CAA74917  | >P37747   | >NRASMR   | >1DYR      | >NP_031475 |         |
| >BAB37623 | >CAA48684  | >P09169   | >JC7310   | > AAC60368 | >NP_005567 |         |
| >BAC21259 | >CAA00187  | >P02933   | >JC4990   | > AAC53663 | >NP_005428 |         |
| >CAA00187 | >P04575    | >P82604   | >JC6005   | > AAC52514 | >2PRN      |         |
| >caa31649 | >P02643    | >Q47278   | >S32494   | > AAC43487 | >AAP47198  |         |
| >caa94639 | >Q9ULZ9    | >AAB25034 | >A42983   | > AAC48984 | >AAA98747  |         |
| >cac80860 | >Q9ESI9    | >P36955   | >CAC42505 | > AAC38578 | >AAL07473  |         |
| >np_00622 | >P49275    | >P55916   | >CAA38080 | > AAC34292 | >AAZ85393  |         |
| >p02643   | >P97521    | >P55851   | >CAA41526 | >CAA73028  | >NP_001011 |         |
| >p04575   | >P13271    | >P39767   | >P07713   | > CAB06820 | >ntCKA3    |         |
| >p18417   | >NP_006221 | >CAA63058 | >AAL96679 | > 1SIP     | >ntCKA2    |         |
| >p21685   | >NP_005944 | >CAA98669 | >AAD09856 | >BAA61829  | >ntCKA1    |         |
| >p21867   | >P33303    | >CAA96855 | >CAA11075 | > AAB71336 | >ntCKB1    |         |
| >p82604   | >O68983    | >CAA90967 | >AAF63204 | >BAA02440  | >atCKA2    |         |

### Soluble proteins data set<sup>b</sup>

|            |                 |
|------------|-----------------|
| >1fsz      | >O31616         |
| >AAA99492  | >CAA06715       |
| >AAB66502  | >P22315         |
| >AAM14744  | >1AF3           |
| >BAA92530  | >2TPT           |
| >BAB03311  | >AAA66289       |
| >CAA82319  | >AAC45645       |
| >CAD42331  | >BAB68505       |
| >NP_217055 | >NP_438572      |
| >NP_217744 | >P31853         |
| >NP_559383 | >Q42539         |
| >P08980    | >terminalntCKB1 |
| >P22061    | >NP_417795      |
| >P51570    | >CAC20129       |
| >P60716    | >AAN81585       |
| >NP_201242 | >NP_003320      |
| >NP_312918 | >AAB53783       |
| >P04789    | >CAA00084       |
| >P15999    |                 |
| >P09743    |                 |

### Unstructured proteins data set<sup>b</sup>

|            |           |             |
|------------|-----------|-------------|
| >NP_000537 | >Q13541   | >P16439T(*) |
| >NP_000086 | >P09803   | >P71413(*)  |
| >NP_001759 | >P04571   | >P69346     |
| >NP_002814 | >P46527   | >P32499     |
| >NP_009292 | >P19429   | >NP_004210  |
| >NP_031695 | >H64966   | >P24588     |
| >NP_013439 | >S48708   | >CAA66701   |
| >NP_006749 | >AAM10853 | >AAB08709   |
| >NP_000336 | >CAB59720 | >NP_736592  |
| >NP_005293 | >AAH00312 | >AAB50256   |
| >P40316    | >BAD20777 | >Q27957     |
| >NP_895627 | >AAQ20894 |             |
| >AAB27444  | >CAA65311 |             |
| >AAB33495  | >AAL18843 |             |
| >P11137    | >1A87     |             |
| >P70445    | >AAC45264 |             |
| >P03045    | >AAC02114 |             |
| >P00560    | >AAB08709 |             |
| >Q03768    | >CAA42717 |             |
| >P43532    | >CAA42650 |             |

**Amyloid proteins data set<sup>b</sup>**

|            |            |            |
|------------|------------|------------|
| >spectrin  | >P51446    | >P10997    |
| >NP_000537 | >P40252    | >AAQ67734  |
| >NP_009292 | >P06396    | >AAC33174  |
| >NP_004039 | >NP_000474 | >1AG2      |
| >NP_000336 | >NP_776351 | >1LOZ      |
| >NP_000475 | >NP_062042 | >BAA00011  |
| >P_002814  | >NP_036718 | >CAA67766  |
| >P02766    | >NP_035448 | >AAB41502  |
| >YLDGA     | >P10636    | >1GXUA     |
| >P05367    | >AAH655291 | >BAA05124  |
| >AAK26231  | >P01034    | >1MVK_G    |
| >3PTE      | >AAB28602  | >Q9Y287    |
| >1GGTB     | >AAB20537  | >NP_612457 |
| >1SPF      | >P04156    | >Q08431    |
| >2EQL      | >A609521   | >NP_002334 |
| >1TCA      | >A23843    | >AAB97519  |
| >1B10(*)   | >S05037    | >Q7SIF8    |
| >CAD91183  | >AAH20795  |            |
| >NP_031497 | >AAH192121 |            |
| >P14621    | >P19707    |            |

**Protein code:**

**(a) SCOP dataset identifies (*sid* format)**

**(b) NCBI dataset accession number**

**(\*) This record has been discontinued.**
